# Supplementary material
Source: Springer Nature journal article supplement (https://www.springermedizin.de/resource/supplementary/13075_2010_3019_MOESM4_ESM.pdf/9693354)
Supplement: MOESM4 [file 9693354]

Total Neutrophils (10<sup>9</sup>/L)

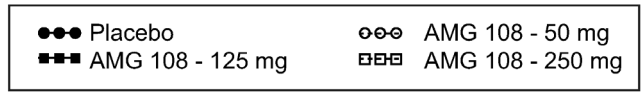

|   |       |       |       |       |       |       |       |       |       |       |       |       |       |      |       |       |       |       |
|---|-------|-------|-------|-------|-------|-------|-------|-------|-------|-------|-------|-------|-------|------|-------|-------|-------|-------|
| ● | N=201 | N=187 | N=186 | N=191 | N=193 | N=190 | N=189 | N=193 | N=192 | N=188 | N=179 | N=188 | N=183 | N=18 | N=187 | N=191 | N=191 | N=189 |
| ○ | N=202 | N=189 | N=193 | N=192 | N=189 | N=191 | N=183 | N=182 | N=183 | N=179 | N=180 | N=175 | N=178 | N=12 | N=182 | N=182 | N=182 | N=178 |
| ■ | N=201 | N=191 | N=191 | N=194 | N=196 | N=188 | N=185 | N=188 | N=184 | N=183 | N=181 | N=186 | N=186 | N=11 | N=183 | N=184 | N=187 | N=179 |
| □ | N=201 | N=194 | N=193 | N=189 | N=192 | N=189 | N=190 | N=189 | N=187 | N=187 | N=180 | N=184 | N=183 | N=14 | N=186 | N=186 | N=187 | N=178 |

0 1 2 3 4 5 6 7 8 9 10 11 12 13 14 15 16 17 18 19 20 21 22 23 24 25

Study Visit (Weeks)
